# Supplementary material for: Prospective, single UK centre, comparative study of the predictive values of contrast-enhanced ultrasound compared to time-resolved CT angiography in the detection and characterisation of endoleaks in high-risk patients undergoing endovascular aneurysm repair surveillance: a protocol
Source: PubMed Central journal article supplement (PMC5892749; doi:10.1136/bmjopen-2017-020835), 2018-04-03
Supplement: bmjopen-2017-020835supp001.pdf [file bmjopen-2017-020835supp001.pdf]

## Data Collection Pro-forma

Participant Study ID:

### Participant Questionnaire:

Reason for further investigation:

Height (cm):

Weight (kg):

Blood Pressure:

Pulse rate:

Functional Status:

0 - you are fully active, more or less as you were before your illness

1 - you cannot carry out heavy physical work, but can do anything else

2 - you are up and about more than half the day. You can look after yourself, but cannot work

Estimated walking distance:

Previous Heart Disease:

Known to have AF or other arrhythmia: Yes/No

Known IHD (Angina, ACS, MI): Yes/No Details:.....

Previous Treatments:

Patients had echo in past: Yes/No Details.....

Current Medications:

## CDU:

Participant Study ID:

Completed by (investigators name):

Time start:

Time Completed:

### Diagnostic images obtained of:

|                                  |        |                             |        |
|----------------------------------|--------|-----------------------------|--------|
| Aortic neck                      | Yes/No |                             |        |
| Aneurysm body with graft in situ | Yes/No |                             |        |
| Bifurcation                      | Yes/No |                             |        |
| Right CIA (Midpoint of limb)     | Yes/No | Left CIA (Midpoint of limb) | Yes/No |
| Right Limb/native transition     | Yes/No | Left Limb/native transition | Yes/No |

### Aortic Measurements:

PSV in native aorta:

Native Aorta PI:

Neck / D2 diameter (mm):

Aneurysm /D3 diameter (mm):

Endoleak seen: Yes/No

| Details:                          | <u>Endoleak 1</u>  | <u>Endoleak 2</u>  | <u>Endoleak 3</u>  |
|-----------------------------------|--------------------|--------------------|--------------------|
| Type:                             | Ia/Ib/II/III/Other | Ia/Ib/II/III/Other | Ia/Ib/II/III/Other |
| Inflow point(s):                  |                    |                    |                    |
| Outflow point(s):                 |                    |                    |                    |
| Certain of flow direction: Yes/No |                    | Yes/No             | Yes/No             |

Limbs:

|                        | <u>Right</u>          | <u>Left</u>           |
|------------------------|-----------------------|-----------------------|
| Distal PSV measurement |                       |                       |
| PI                     |                       |                       |
| Wave form              | Mono / Bi / Triphasic | Mono / Bi / Triphasic |

Comments:

Common Femoral Arteries:

|                        | <u>Right</u>          | <u>Left</u>           |
|------------------------|-----------------------|-----------------------|
| Distal PSV measurement |                       |                       |
| PI                     |                       |                       |
| Wave form              | Mono / Bi / Triphasic | Mono / Bi / Triphasic |

Comments:

**CEUS:**

Participant Study ID:

Completed by (investigators name):

Time start:

Time Completed:

First Contrast Injection: (all timings from start of contrast injection)

Time till seen in graft(s):

Time till seen in endoleak (s):

Contrast seen in Endoleak 1: Yes / No

Endoleak 1 Type: Ia/Ib/II/III/Other

Contrast Seen in Endoleak 2: Yes / No

Endoleak 2 Type: Ia/Ib/II/III/Other

Contrast seen in Endoleak 3: Yes / No

Endoleak 3 Type: Ia/Ib/II/III/Other

Second Contrast Injection:

Time till seen in graft(s):

Time till seen in endoleak (s):

Contrast seen in Endoleak 1: Yes / No

Endoleak 1 Type: Ia/Ib/II/III/Other

Contrast Seen in Endoleak 2: Yes / No

Endoleak 2 Type: Ia/Ib/II/III/Other

Contrast seen in Endoleak 3: Yes / No

Endoleak 3 Type: Ia/Ib/II/III/Other

## Temporal CTA (in scan measurements)

Participant Study ID: \_\_\_\_\_ Completed by (investigators name): \_\_\_\_\_

Time start: \_\_\_\_\_ Time Completed: \_\_\_\_\_

### Temporal CTA (reporting)

Completed by (investigators name): \_\_\_\_\_

Time reporting started: \_\_\_\_\_ Time reporting finished: \_\_\_\_\_

### Phase 2.5 Seconds

Image quality: Fully diagnostic      5      4      3      2      1      Non-diagnostic

Endoleak seen:      Yes/No

Details:      Endoleak 1      Endoleak 2      Endoleak 3

Type:      Ia/Ib/II/III/Other      Ia/Ib/II/III/Other      Ia/Ib/II/III/Other

Inflow point(s):

HU at inflow:

Outflow point(s):

HU at outflow:

Certain of flow direction: Yes/No      Yes/No      Yes/No

Hounsfield Unit measurements: (excluding any calcification of graft structures)

Inferior vena cava: ..... HU

Aortic lumen at superior fabric markers of endograft: ..... HU

Aortic lumen at bifurcation of endograft: ..... HU

Iliac lumen at Distal end of right limb of endograft ..... HU

Iliac lumen at distal end of left limb of endograft ..... HU

### Phase 5 Seconds

Image quality: Fully diagnostic      5      4      3      2      1      Non-diagnostic

Endoleak seen:      Yes/No

Details:      Endoleak 1      Endoleak 2      Endoleak 3

Type:      Ia/Ib/II/III/Other      Ia/Ib/II/III/Other      Ia/Ib/II/III/Other

Inflow point(s):

HU at inflow:

Outflow point(s):

HU at outflow:

Certain of flow direction: Yes/No      Yes/No      Yes/No

Hounsfield Unit measurements: (excluding any calcification of graft structures)

Inferior vena cava: ..... HU

Aortic lumen at superior fabric markers of endograft: ..... HU

Aortic lumen at bifurcation of endograft: ..... HU

Iliac lumen at Distal end of right limb of endograft ..... HU

Iliac lumen at distal end of left limb of endograft ..... HU

Phase 7.5 Seconds

|                            |                    |                    |        |                    |   |        |                |
|----------------------------|--------------------|--------------------|--------|--------------------|---|--------|----------------|
| Image quality:             | Fully diagnostic   | 5                  | 4      | 3                  | 2 | 1      | Non-diagnostic |
| Endoleak seen:             | Yes/No             |                    |        |                    |   |        |                |
| Details:                   | <u>Endoleak 1</u>  | <u>Endoleak 2</u>  |        | <u>Endoleak 3</u>  |   |        |                |
| Type:                      | Ia/Ib/II/III/Other | Ia/Ib/II/III/Other |        | Ia/Ib/II/III/Other |   |        |                |
| Inflow point(s):           |                    |                    |        |                    |   |        |                |
| HU at inflow:              |                    |                    |        |                    |   |        |                |
| Outflow point(s):          |                    |                    |        |                    |   |        |                |
| HU at outflow:             |                    |                    |        |                    |   |        |                |
| Certain of flow direction: | Yes/No             |                    | Yes/No |                    |   | Yes/No |                |

Hounsfield Unit measurements: (excluding any calcification of graft structures)

Inferior vena cava: ..... HU  
Aortic lumen at superior fabric markers of endograft: ..... HU  
Aortic lumen at bifurcation of endograft: ..... HU  
Iliac lumen at Distal end of right limb of endograft ..... HU  
Iliac lumen at distal end of left limb of endograft ..... HU

Phase 10 Seconds

|                            |                    |                    |        |                    |   |        |                |
|----------------------------|--------------------|--------------------|--------|--------------------|---|--------|----------------|
| Image quality:             | Fully diagnostic   | 5                  | 4      | 3                  | 2 | 1      | Non-diagnostic |
| Endoleak seen:             | Yes/No             |                    |        |                    |   |        |                |
| Details:                   | <u>Endoleak 1</u>  | <u>Endoleak 2</u>  |        | <u>Endoleak 3</u>  |   |        |                |
| Type:                      | Ia/Ib/II/III/Other | Ia/Ib/II/III/Other |        | Ia/Ib/II/III/Other |   |        |                |
| Inflow point(s):           |                    |                    |        |                    |   |        |                |
| HU at inflow:              |                    |                    |        |                    |   |        |                |
| Outflow point(s):          |                    |                    |        |                    |   |        |                |
| HU at outflow:             |                    |                    |        |                    |   |        |                |
| Certain of flow direction: | Yes/No             |                    | Yes/No |                    |   | Yes/No |                |

Hounsfield Unit measurements: (excluding any calcification of graft structures)

Inferior vena cava: ..... HU  
Aortic lumen at superior fabric markers of endograft: ..... HU  
Aortic lumen at bifurcation of endograft: ..... HU  
Iliac lumen at Distal end of right limb of endograft ..... HU  
Iliac lumen at distal end of left limb of endograft ..... HU

Phase 15 Seconds

|                            |                    |                    |        |                    |   |        |                |
|----------------------------|--------------------|--------------------|--------|--------------------|---|--------|----------------|
| Image quality:             | Fully diagnostic   | 5                  | 4      | 3                  | 2 | 1      | Non-diagnostic |
| Endoleak seen:             | Yes/No             |                    |        |                    |   |        |                |
| Details:                   | <u>Endoleak 1</u>  | <u>Endoleak 2</u>  |        | <u>Endoleak 3</u>  |   |        |                |
| Type:                      | Ia/Ib/II/III/Other | Ia/Ib/II/III/Other |        | Ia/Ib/II/III/Other |   |        |                |
| Inflow point(s):           |                    |                    |        |                    |   |        |                |
| HU at inflow:              |                    |                    |        |                    |   |        |                |
| Outflow point(s):          |                    |                    |        |                    |   |        |                |
| HU at outflow:             |                    |                    |        |                    |   |        |                |
| Certain of flow direction: | Yes/No             |                    | Yes/No |                    |   | Yes/No |                |

Hounsfield Unit measurements: (excluding any calcification of graft structures)

Inferior vena cava: ..... HU  
Aortic lumen at superior fabric markers of endograft: ..... HU  
Aortic lumen at bifurcation of endograft: ..... HU  
Iliac lumen at Distal end of right limb of endograft ..... HU  
Iliac lumen at distal end of left limb of endograft ..... HU

Phase 20 Seconds

|                            |                    |                    |        |                    |   |        |                |
|----------------------------|--------------------|--------------------|--------|--------------------|---|--------|----------------|
| Image quality:             | Fully diagnostic   | 5                  | 4      | 3                  | 2 | 1      | Non-diagnostic |
| Endoleak seen:             | Yes/No             |                    |        |                    |   |        |                |
| Details:                   | <u>Endoleak 1</u>  | <u>Endoleak 2</u>  |        | <u>Endoleak 3</u>  |   |        |                |
| Type:                      | Ia/Ib/II/III/Other | Ia/Ib/II/III/Other |        | Ia/Ib/II/III/Other |   |        |                |
| Inflow point(s):           |                    |                    |        |                    |   |        |                |
| HU at inflow:              |                    |                    |        |                    |   |        |                |
| Outflow point(s):          |                    |                    |        |                    |   |        |                |
| HU at outflow:             |                    |                    |        |                    |   |        |                |
| Certain of flow direction: | Yes/No             |                    | Yes/No |                    |   | Yes/No |                |

Hounsfield Unit measurements: (excluding any calcification of graft structures)

Inferior vena cava: ..... HU  
Aortic lumen at superior fabric markers of endograft: ..... HU  
Aortic lumen at bifurcation of endograft: ..... HU  
Iliac lumen at Distal end of right limb of endograft ..... HU  
Iliac lumen at distal end of left limb of endograft ..... HU

Phase 25 Seconds

|                            |                    |                    |                    |                    |                    |                    |                |
|----------------------------|--------------------|--------------------|--------------------|--------------------|--------------------|--------------------|----------------|
| Image quality:             | Fully diagnostic   | 5                  | 4                  | 3                  | 2                  | 1                  | Non-diagnostic |
| Endoleak seen:             | Yes/No             |                    |                    |                    |                    |                    |                |
| Details:                   | <u>Endoleak 1</u>  | <u>Endoleak 2</u>  |                    | <u>Endoleak 3</u>  |                    |                    |                |
| Type:                      | Ia/Ib/II/III/Other | Ia/Ib/II/III/Other | Ia/Ib/II/III/Other | Ia/Ib/II/III/Other | Ia/Ib/II/III/Other | Ia/Ib/II/III/Other |                |
| Inflow point(s):           |                    |                    |                    |                    |                    |                    |                |
| HU at inflow:              |                    |                    |                    |                    |                    |                    |                |
| Outflow point(s):          |                    |                    |                    |                    |                    |                    |                |
| HU at outflow:             |                    |                    |                    |                    |                    |                    |                |
| Certain of flow direction: | Yes/No             |                    | Yes/No             |                    |                    | Yes/No             |                |

Hounsfield Unit measurements: (excluding any calcification of graft structures)

Inferior vena cava: ..... HU  
Aortic lumen at superior fabric markers of endograft: ..... HU  
Aortic lumen at bifurcation of endograft: ..... HU  
Iliac lumen at Distal end of right limb of endograft ..... HU  
Iliac lumen at distal end of left limb of endograft ..... HU

Venous Phase

|                            |                    |                    |                    |                    |                    |                    |                |
|----------------------------|--------------------|--------------------|--------------------|--------------------|--------------------|--------------------|----------------|
| Image quality:             | Fully diagnostic   | 5                  | 4                  | 3                  | 2                  | 1                  | Non-diagnostic |
| Endoleak seen:             | Yes/No             |                    |                    |                    |                    |                    |                |
| Details:                   | <u>Endoleak 1</u>  | <u>Endoleak 2</u>  |                    | <u>Endoleak 3</u>  |                    |                    |                |
| Type:                      | Ia/Ib/II/III/Other | Ia/Ib/II/III/Other | Ia/Ib/II/III/Other | Ia/Ib/II/III/Other | Ia/Ib/II/III/Other | Ia/Ib/II/III/Other |                |
| Inflow point(s):           |                    |                    |                    |                    |                    |                    |                |
| HU at inflow:              |                    |                    |                    |                    |                    |                    |                |
| Outflow point(s):          |                    |                    |                    |                    |                    |                    |                |
| HU at outflow:             |                    |                    |                    |                    |                    |                    |                |
| Certain of flow direction: | Yes/No             |                    | Yes/No             |                    |                    | Yes/No             |                |

Hounsfield Unit measurements: (excluding any calcification of graft structures)

Inferior vena cava: ..... HU  
Aortic lumen at superior fabric markers of endograft: ..... HU  
Aortic lumen at bifurcation of endograft: ..... HU  
Iliac lumen at Distal end of right limb of endograft ..... HU  
Iliac lumen at distal end of left limb of endograft ..... HU

Other comments / diagnostic findings:
